# Supplementary material
Source: publisher figshare collection journal article supplement (https://sage.figshare.com/ndownloader/files/17459594)
Supplement: Supplementary file 1 [file 17459594]

## **Supplemental Materials**

### **Inclusion criteria to receive invitation to participate:**

All pediatrics residents who had completed at least one of the following 4-week rotation at either hospital site in which they provided clinical care for children with neurological conditions:

- Lucile Packard Children's Hospital
  - Inpatient General Pediatrics
  - Inpatient Neonatal Intensive Care Unit
  - Inpatient Pediatric Intensive Care Unit
  - Outpatient Developmental and Behavioral Pediatrics
- Santa Clara Valley Medical Center
  - Inpatient Pediatrics
  - Inpatient Pediatric Intensive Care Unit

## Supplemental Materials

### List of Codes

|                                                                  |                                                                        |
|------------------------------------------------------------------|------------------------------------------------------------------------|
| Seizure/epilepsy/status epilepticus/infantile spasms             | Respect for neurology team (attitude of intellectual curiosity/skills) |
| Headaches/migraines                                              | Fear of neurology                                                      |
| Extraocular movements/visual fields                              | Understanding that neurology exam impacts management decisions         |
| Developmental delay                                              | Understanding expectation from expert                                  |
| Cerebellar signs and symptoms                                    | More teaching leads to less inappropriate consults                     |
| Concussion management                                            | Need for more neurology teaching beyond learning from experience       |
| Head trauma (hemorrhage/hematoma)                                | Neurology fellows are teachers                                         |
| Encephalopathy/encephalitis (bacterial, viral, autoimmune, NMDR) | Attendings at Madera are teachers                                      |
| Cerebral palsy                                                   | Bedside nurse are teachers                                             |
| Brain death                                                      | NICU NNPs are teachers                                                 |
| Hyperammonemia/encephalopathy                                    | All pediatric residents should be teachers                             |
| Frontal signs                                                    | Neurology attending should be teachers                                 |
| PANS                                                             | Primary non-neurology should be teachers                               |
| Hypoxic injury                                                   | Neurology clinic as location for learning                              |
| Stroke                                                           | Make neurology a required rotation                                     |
| Functional disorders                                             | DBP as location for learning                                           |
| Cauda Equina Syndrome                                            | HRIF as location for learning                                          |
| Tethered cord                                                    | Teaching senior rotation as location for learning                      |
| Spina Bifida                                                     | Complex care clinic on primary care rotation as location for learning  |
| Medication management/side effects                               | Allow neurology to be 2-week selective                                 |
| Monitoring labs for medications                                  | Learning from experience                                               |
| Knowing relationship of inpatient and outpatient care            | Indirect or direct feedback of physical exam                           |
| Anticipatory guidance/prognosis/long term consequences           | Working directly with/observing fellow is helpful                      |
| Don't know localization                                          | Being part of decision-making with neurology                           |
| Building framework for approaching neurology                     | Explanation of thoughts                                                |
| Red flags that require urgent action                             | Integration into neurology team                                        |
| Lack of neurology vocabulary/terminology                         | Neurology's expertise in clinical management                           |
| Knowing how to document                                          | Asking questions in safe environment                                   |
| Resources available for patients with neurological conditions    | Learning from volume of neurology patients                             |
| AEEG                                                             | Learning from fellow notes                                             |
| BRUE                                                             | Being on rounds                                                        |
| Knowing general neurology physical exam                          | Asking for help                                                        |
| Neuropathy                                                       | All team members should communicate                                    |
| Mini Mental Status Exam                                          | YouTube videos                                                         |
| Neonatal/Infant neurological exam                                | UpToDate                                                               |
| Reflexes                                                         | Physical proximity to fellows may help learning                        |
| Tone                                                             | Self-driven learning                                                   |

### List of Codes (continued)

|                                                                                      |                                                                                     |
|--------------------------------------------------------------------------------------|-------------------------------------------------------------------------------------|
| Abnormal movements/sensory exam                                                      | Medical school experience affects resident experiences                              |
| Adapting exam to age and condition (intubated, sedated, obtunded)                    | Bedside teaching                                                                    |
| Exam tips/maneuvers/tools                                                            | Video primer                                                                        |
| Unable to elicit subtle exam findings                                                | Reference guide                                                                     |
| Developing a differential                                                            | Short and brief teaching points/didactics/on the fly teaching                       |
| Appropriate work-up/tests/imaging/orders                                             | Need to include all levels of learners in curriculum                                |
| How to triage outpatient neurological problems                                       | Repeating topics                                                                    |
| Outpatient work up                                                                   | Online modules                                                                      |
| Communication with family                                                            | Opportunities to practice to learn                                                  |
| Communication with specialty about care/different plans                              | Physical finding rounds                                                             |
| How to navigate outpatient neurology referrals                                       | Standardized patients                                                               |
| Unprepared                                                                           | 10 most common neurological conditions                                              |
| Frontline provider                                                                   | Podcast                                                                             |
| Unsure how to do a more focused exam                                                 | Khan Academy-style teaching                                                         |
| Passiveness/devaluation of own skills                                                | Patients with chronic neurological conditions can be difficult to see/disheartening |
| Lack of autonomy                                                                     | Loss of skill without practice                                                      |
| Low expectation of self                                                              | Social/medical complexity                                                           |
| Lack of confidence in neurological skills/exam findings/initial management           | Lack of direct/indirect supervision/feedback on exam findings                       |
| Unsure how to interpret exam                                                         | Lack of didactics                                                                   |
| Embarrassing for seniors to not know neurology                                       | Neurology-directed management                                                       |
| Prepared with performing exam                                                        | Neurology is taught in fragments across residency                                   |
| Prepared with general knowledge                                                      | Teacher's attitude affects learner's experience                                     |
| Experiences develop trust in own exam                                                | Neuro exam not part of standard exam                                                |
| Experiences develop comfort with recognizing sick vs non-sick                        | Exam is burdensome for examiner and patient                                         |
| Experiences develop comfort with ruling out dangerous things                         | Variation of exam findings based on examiner                                        |
| Experiences develop comfort with managing seizures                                   | Difficulty with exam at multiple levels of providers                                |
| "Call neuro"/instant response                                                        | Lack of exposure/experience                                                         |
| Dependence on neurology                                                              | Patient volume as barrier                                                           |
| Variation of dependence on neurology based on institution                            | Time pressure as barrier to detailed neurological exam/learning neurology           |
| Perception that others are not comfortable with your exam skills                     | Neurology patients can be ignored                                                   |
| Perceived shotgun approach to ordering labs give negative attitude towards neurology | Fellows can be intimidating                                                         |
| [Power of] Empowering residents to create plan                                       | Fellows' approachability affects consults                                           |
| Need for focused/appropriate consult question                                        | Fellows' approachability affects patient care                                       |

## **Supplemental Materials**

### **Focus Group Questions**

- 1) During residency, in what ways did you feel prepared or unprepared to care for a patient with a neurological problem?
- 2) If anything, what neurological knowledge or skill did you learn from this patient care experience?
- 3) If you were an advisor hired to help develop child neurology education for pediatric residents, what advice would you give?
- 4) How have the experiences you've had thus far shaped your attitudes towards learning and practicing neurology?
